# Supplementary material for: Recycling of memory B cells between germinal center and lymph node subcapsular sinus supports affinity maturation to antigenic drift
Source: PubMed Central journal article supplement (PMC9072412; doi:10.1038/s41467-022-29978-y), 2022-05-05
Supplement: 41467_2022_29978_MOESM1_ESM.pdf [file 41467_2022_29978_MOESM1_ESM.pdf]

## Supplementary Information

Recycling of memory B cell between germinal center and lymph node subcapsular sinus supports affinity maturation to antigenic drift

Yang Zhang<sup>1, 13</sup>, Laura Garcia-Ibanez<sup>1, 13</sup>, Carolin Ulbricht<sup>2</sup>, Laurence S C Lok<sup>3</sup>, Jeremy A Pike<sup>4</sup>, Jennifer Mueller-Winkler<sup>5</sup>, Thomas W Dennison<sup>3</sup>, John R Ferdinand<sup>3</sup>, Cameron J M Burnett<sup>1</sup>, Juan C Yam-Puc<sup>1</sup>, Lingling Zhang<sup>1, 5</sup>, Raul Maqueda Alfaro<sup>1, 6</sup>, Yousuke Takahama<sup>7</sup>, Izumi Ohigashi<sup>8</sup>, Geoffrey Brown<sup>6</sup>, Tomohiro Kurosaki<sup>9, 10</sup>, Victor L J Tybulewicz<sup>5, 11</sup>, Antal Rot<sup>12</sup>, Anja E Hauser<sup>2</sup>, Menna R Clatworthy<sup>3</sup>, Kai-Michael Toellner<sup>1</sup>

<sup>1</sup> Institute of Immunology and Immunotherapy, College of Medical and Dental Sciences, University of Birmingham, Birmingham, UK. <sup>2</sup> Department of Rheumatology and Clinical Immunology, Charité - Universitätsmedizin Berlin, corporate member of Freie Universität Berlin and Humboldt-Universität zu Berlin, 10117 Berlin, Germany, and Deutsches Rheuma-Forschungszentrum (DRFZ), a Leibniz Institute, Charitéplatz 1, 10117 Berlin, Germany, <sup>3</sup> University of Cambridge Molecular Immunity Unit, MRC Laboratory of Molecular Biology, Cambridge Biomedical Campus, Cambridge, UK, <sup>4</sup> Centre of Membrane Proteins and Receptors (COMPARE), Universities of Birmingham and Nottingham, UK, and Institute of Cardiovascular Sciences, College of Medical and Dental Sciences, University of Birmingham, UK <sup>5</sup> The Francis Crick Institute, London, UK, <sup>6</sup> Department of Cell Biology, Center for Research and Advanced Studies, The National Polytechnic Institute, Cinvestav-IPN, Av. IPN 2508, San Pedro Zacatenco, Gustavo A. Madero, 07360 Mexico City, Mexico, <sup>7</sup> Thymus Biology Section, Experimental Immunology Branch, National Cancer Institute, National Institutes of Health, Bethesda, MD, 20892, USA, <sup>8</sup> Division of Experimental Immunology, Institute of Advanced Medical Sciences, University of Tokushima, Tokushima, 770-8503, Japan, <sup>9</sup> Laboratory of Lymphocyte Differentiation, WPI Immunology Frontier Research Center, Osaka University, Osaka 565-0871, Japan, <sup>10</sup> Laboratory of Lymphocyte Differentiation, RIKEN Center for Integrative Medical Sciences (IMS), Yokohama, Kanagawa 230-0045, Japan, <sup>11</sup> Imperial College, London W12 0NN, UK, <sup>12</sup> Centre for Microvascular Research, The William Harvey Research Institute, Queen Mary University London, EC1M 6BQ London, UK; Centre for Inflammation and Therapeutic Innovation, Queen Mary University London, EC1M 6BQ London, UK; Institute for Cardiovascular Prevention, Ludwig-Maximilians University, 80336 Munich, Germany. <sup>13</sup> Contributed equally.

Correspondence to:

Kai-Michael Toellner, PhD

Institute of Immunology and Immunotherapy

College of Medical and Dental Sciences

The University of Birmingham

B15 2TT UK

[e-mail: k.m.toellner@bham.ac.uk](mailto:k.m.toellner@bham.ac.uk)

phone: +44 121 415 8681

Fax: +44 121 41 43599

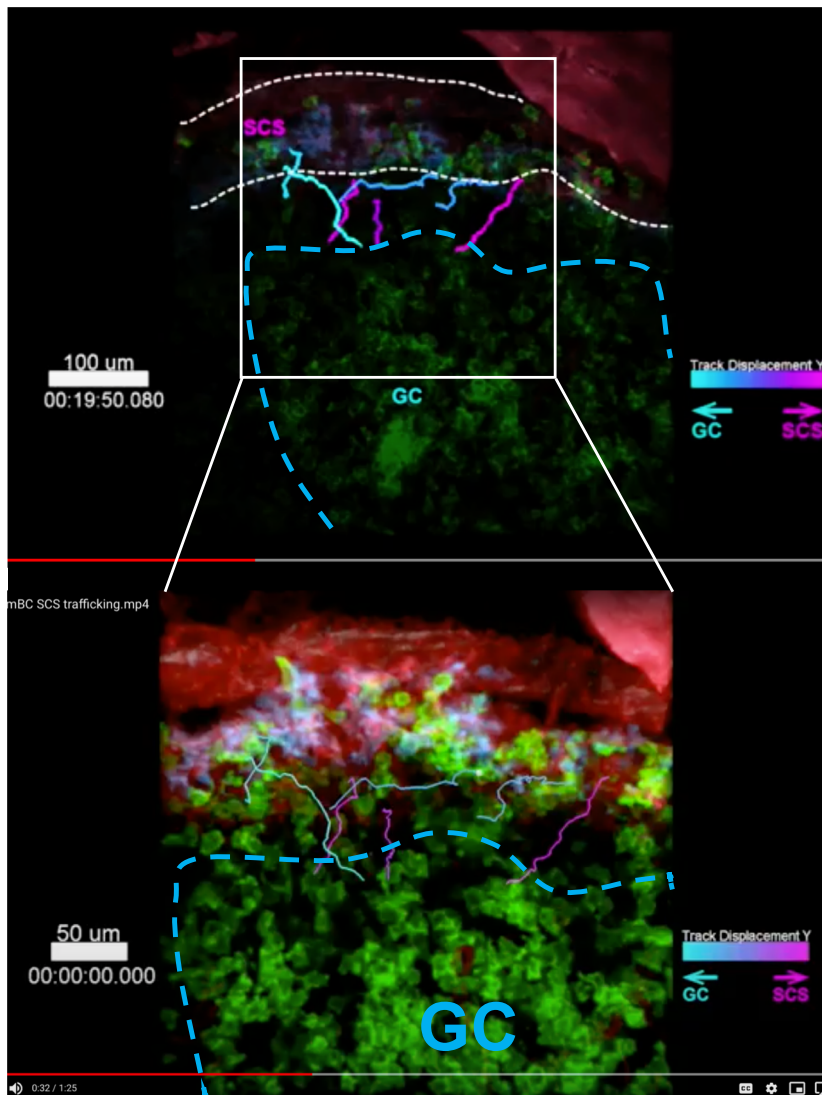

### Supplementary Figure 1: B<sub>EM</sub> recycling between GC and SCS

Still image from intravital microscopy videos of *Cy1Cre mTmG ACKR4<sup>+/+</sup>* in drLN 8 d after foot immunization. Prior recombination, *Cy1Cre mTmG* mice express membrane targeted tdTomato (mT) in all body cells. Following B cell activation, Cre expression through induction of IgG1 heavy chain germline transcripts leads to excision of the loxp-flanked mT gene and expression of membrane targeted eGFP (mG)<sup>1</sup>. mG-labelled B<sub>EM</sub> (green), mT-labelled stroma (red) and CD169 labelled SCS macrophages (blue). B<sub>EM</sub> were manually tracked moving from the GC towards the SCS (pink tracks) or recycling from the SCS to the GC (blue tracks). Representative image of 7 *Cy1Cre mTmG ACKR4<sup>+/+</sup>* mice.

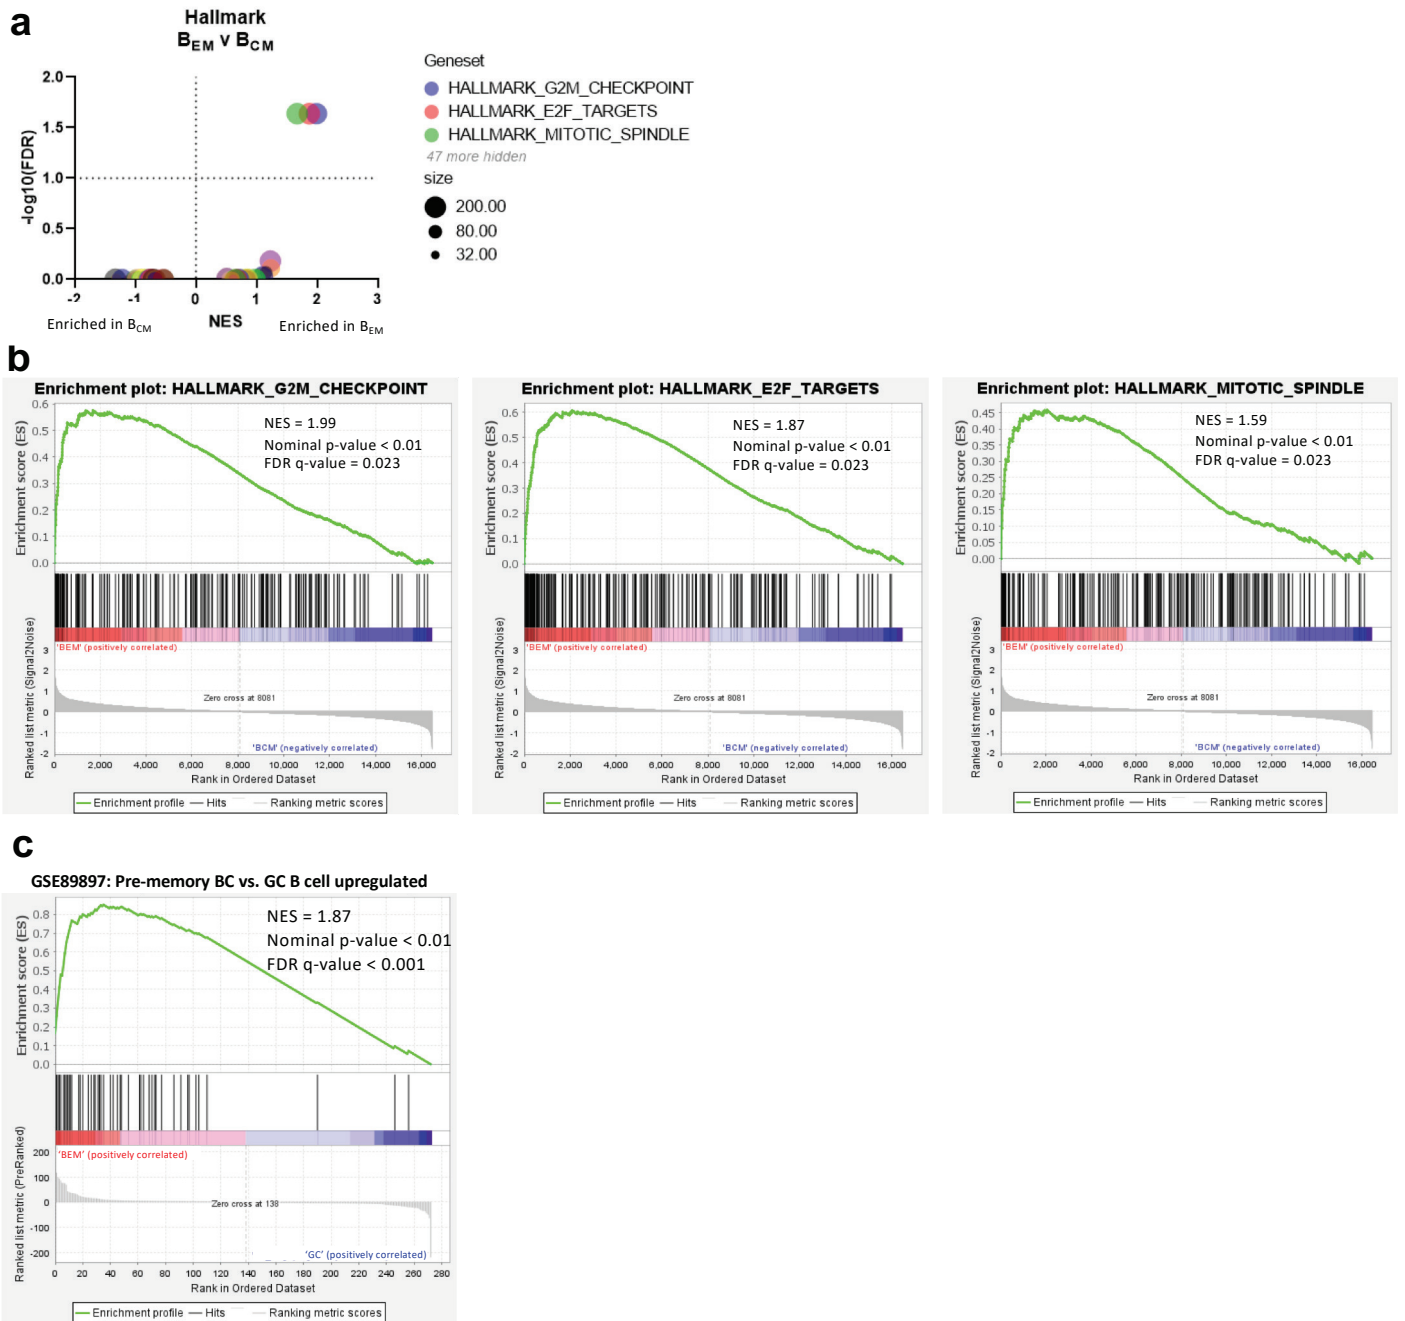

## Supplementary Figure 2: Gene set enrichment analysis (GSEA)

RNA sequencing data was aligned to GRCm38 genome and counted by STAR 2.7.3a. Gene set enrichment analysis was performed on emigrating memory B cells (B<sub>EM</sub>) compared with circulating memory B cells (B<sub>CM</sub>) using the Hallmark gene set collection<sup>2</sup>. GSEA software used was GSEA 4.1.0 (Broad Institute). **a** Bubble plot represents complete Hallmark GSEA of BEM v BCM normalized counts. Each point is scaled to the size of the gene set (after being restricted to the data set). NES: Normalized enrichment score. Figure legend lists significantly enriched gene sets (FDR < 0.1). **b** Gene set enrichment plots of significantly enriched gene sets from Hallmark GSEA of BEM v BCM. **c** RNA sequencing data was counted and aligned to GRCm38 genome by Partek Flow. Pre-ranked dataset isolated from gene specific analysis of BEM v GC with P-value < 0.05 and ranked by fold change. GSEA was performed using this pre-ranked list against the pre-memory B cell gene expression profile from Laidlaw et al.<sup>3</sup> using genes upregulated in pre-memory B cells compared GC B cells<sup>3</sup>. Raw counts data accessed from gene expression omnibus from GSE89897, with pre-memory B cells defined as Ephrin-B1<sup>+</sup> S1PR2-Venus<sup>-</sup> B cells in drLN and GC B cells defined as Ephrin-B1<sup>+</sup> S1PR2-Venus<sup>+</sup> B cells in drLN.

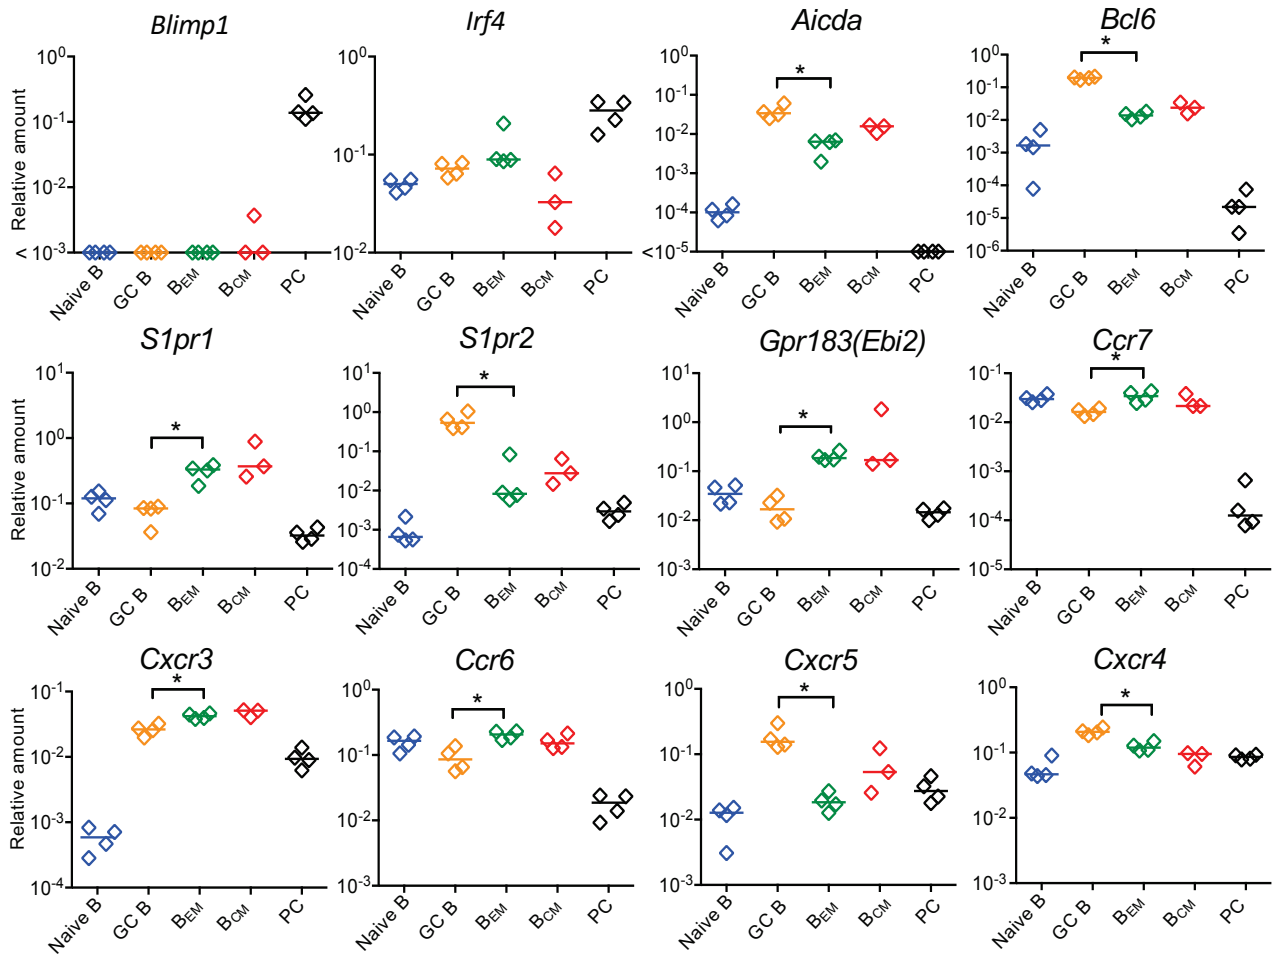

### Supplementary Figure 3: Gene expression on different B cell populations.

Selected genes expressed on different populations FACS sorted from popliteal lymph node in C57BL/6J mice that had received NP<sup>+</sup> B cells from Cy1Cre QM mT/mG, 8 d after foot injection.

Each diamond represents pooled cells from both popliteal drLN nodes of 4 mice, representative of 3 independent experiments (total n=12 mice). All values are relative to *b2m* mRNA. Two-tailed Mann-Whitney testing. Statistical significance (\*: p=0.0286) is only indicated for gene expression differences between GC BC and B<sub>EM</sub>.

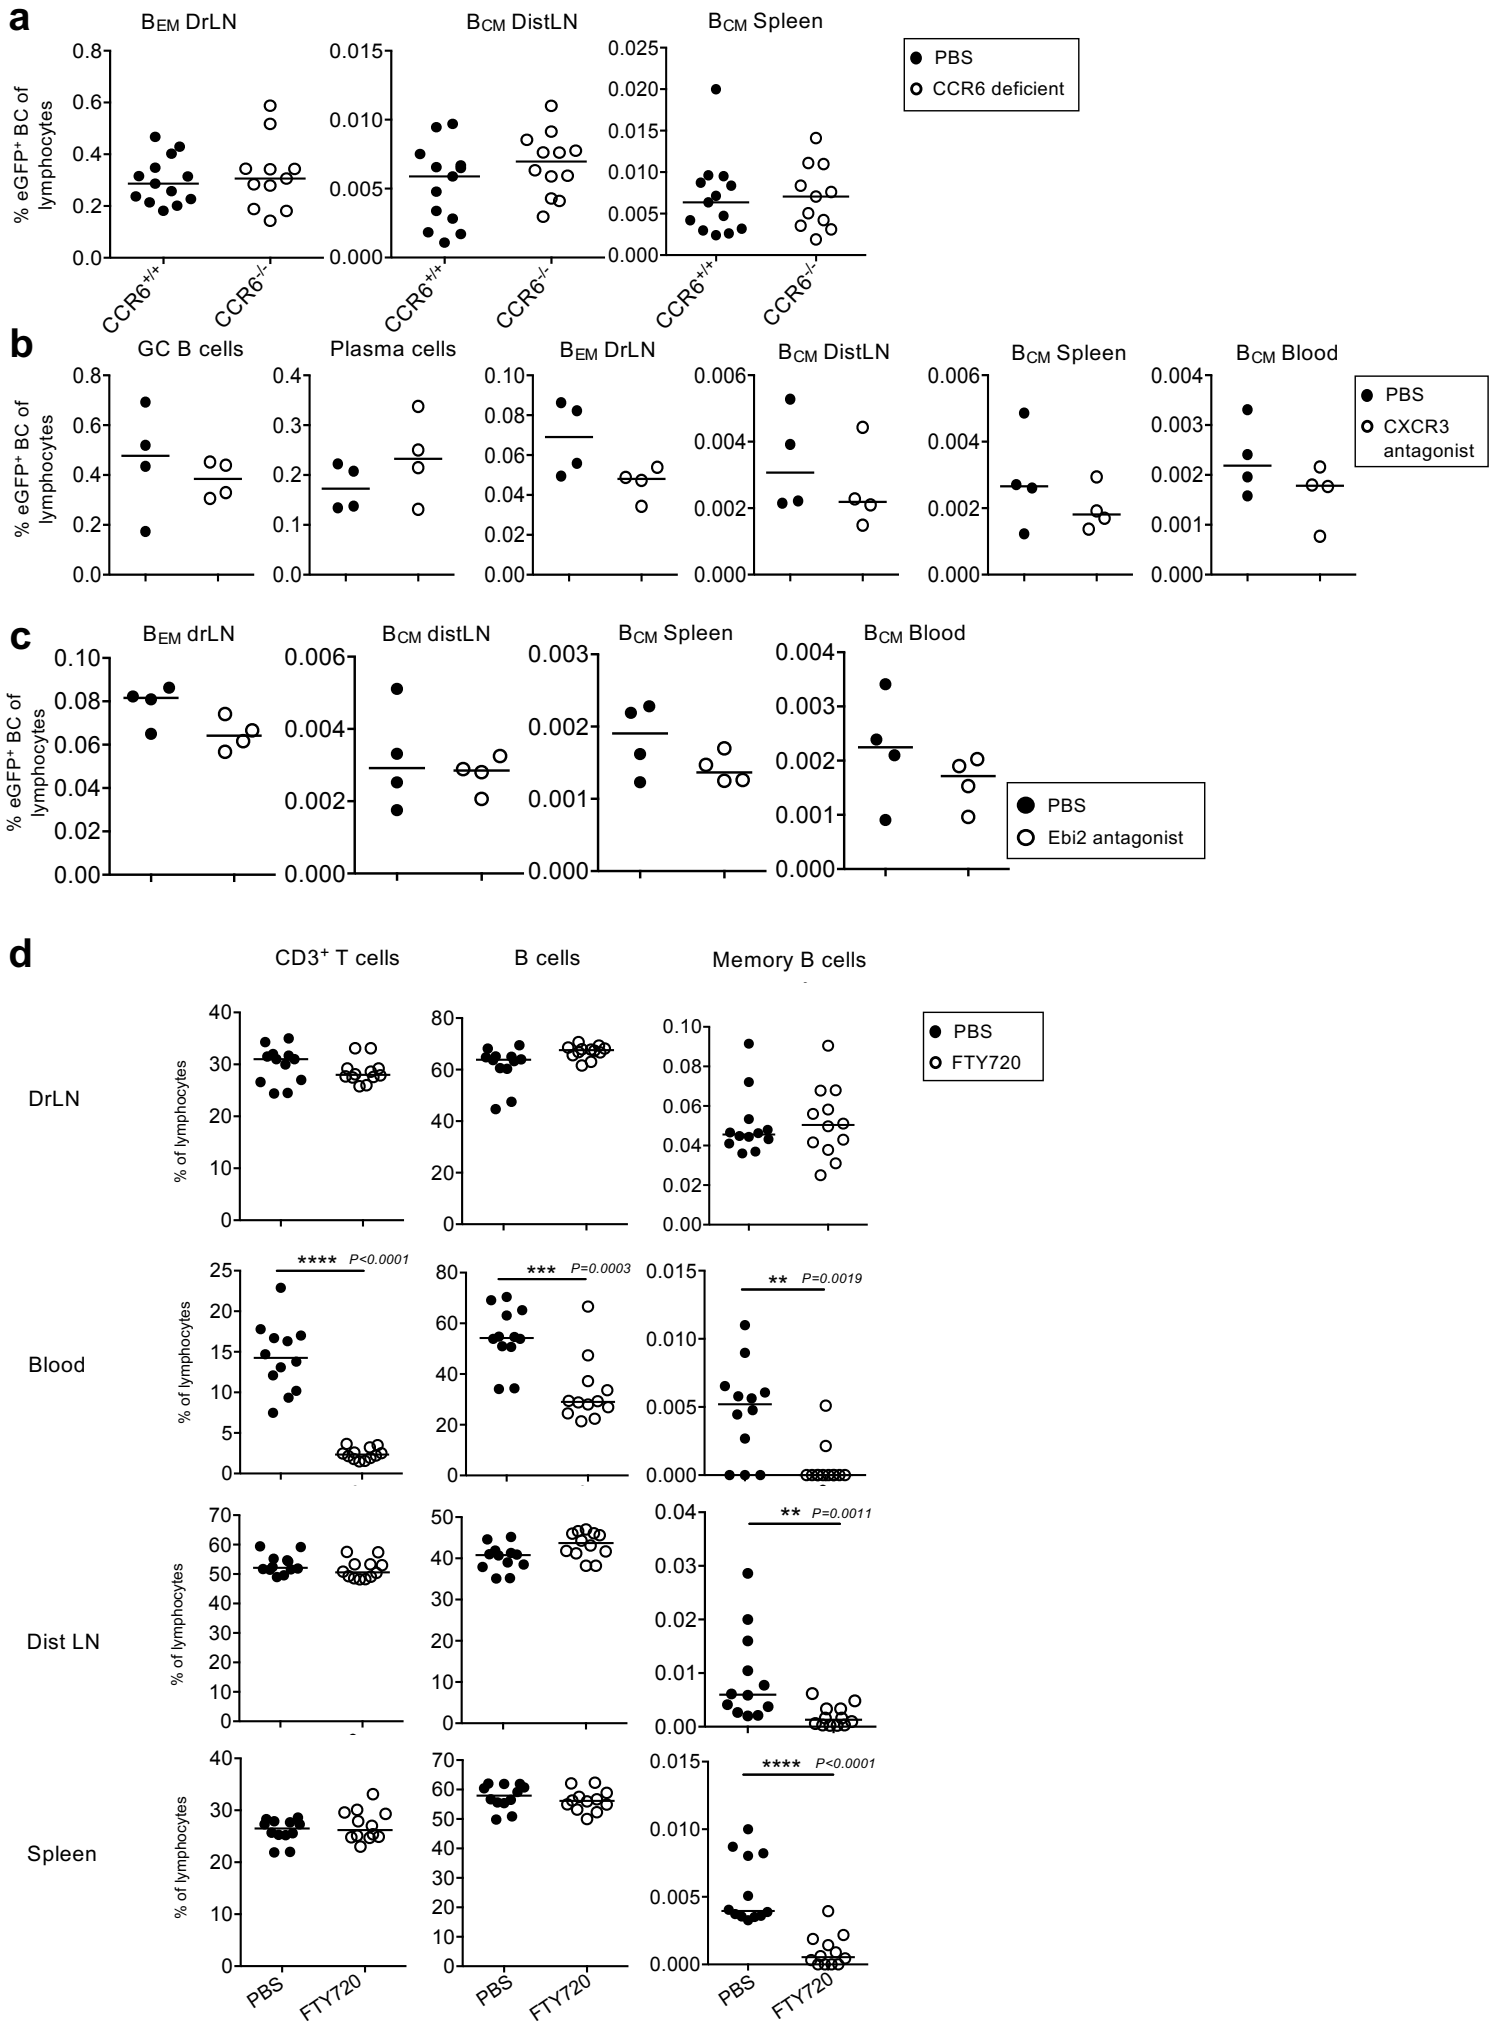

Supplementary Figure 4: Effect of blocking S1PR, CCR6, CXCR3, or EBI2 signals.

**Supplementary Figure 4: Effect of blocking CCR6, CXCR3, EBI2, or S1PR signals.**

**a** Effect of CCR6 deficiency for the production of  $B_{EM}$ . NP-specific B cells from Cy1Cre QM mTmG or Cy1Cre QM mTmG CCR6 ko mice were transferred into C57BL/6J recipients separately, followed by foot immunization with NP-CGG in alum. Gating scheme for eGFP<sup>+</sup> B emerging from GC ( $B_{EM}$ ) in draining LN (drLN) and eGFP<sup>+</sup> circulating B cells ( $B_{CM}$ ) in distant LN (distLN) and spleen were measured by flow cytometry at 8 d after immunization. Data pooled from 3 independent experiments with 3-4 mice each (total n=12). **b** Effect of CXCR3 blockade on the production of  $B_{EM}$ . NP-specific B cells from Cy1Cre QM mTmG mice were transferred into C57BL/6J recipients, followed by foot immunization with NP-CGG in alum one day later. eGFP<sup>+</sup>  $B_{EM}$  in draining LN (drLN) and eGFP<sup>+</sup>  $B_{CM}$  in distLN, spleen, and blood were measured by flow cytometry at 5 h after NBI74330 (CXCR3 antagonist, 60 ug / mouse) treatment via i.p. at 8 d after NP-CGG immunization. Each symbol represents one mouse. Data from one experiment (n=4). **c** Effect of Ebi2 blockade for the production of memory B cells. NP-specific B cells from Cy1Cre QM mT/mG mouse were transferred into C57BL/6J recipients separately, followed by foot immunization with NP-CGG in alum. eGFP<sup>+</sup> B emerging from GC ( $B_{EM}$ ) in draining LN (drLN) and eGFP<sup>+</sup> circulating B cells ( $B_{CM}$ ) in distant LN (distLN) and spleen were measured by flow cytometry at 5hr after NIBR189 (Ebi2 antagonist, 60ug/mouse) treatment via i.p. at 8 d after NP-CGG immunization. Each symbol represents one mouse. Data from one experiment (n=4). **d** Effect of S1PR on the migration of naïve T helper and B cells, and memory B cells. Mice received FTY720 over 2 d before tissue collection. Total CD3<sup>+</sup> T cells, B220<sup>+</sup> B cells, and  $B_{EM}$  in draining lymph node or  $B_{CM}$  in blood, distant lymph nodes, and spleens were analyzed by flow cytometry. Each symbol represents one mouse. Data merged from three independent experiments (total n=12). Two-tailed Mann-Whitney test.

**a**

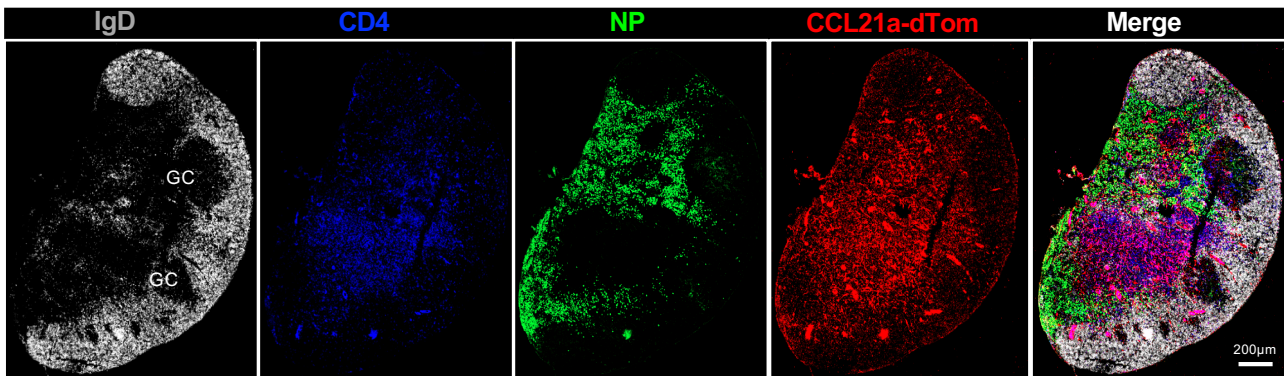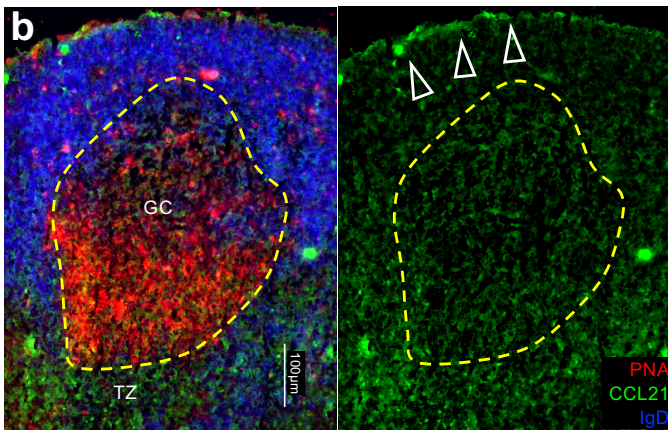

**Supplementary Figure 5: CCL21 expression in and under the SCS floor endothelium.**

**a** Popliteal lymph node from a heterozygous *Ccl21*<sup>tdTom</sup> reporter mouse 8 d after foot immunization with NP-CGG showing CCL21a expression in SCS floor endothelium and stromal cells in the follicle. tdTomato (red), immunohistology for IgD to indicate follicles and GCs (grey), CD4 for T zone (blue), NP-specific binding on plasma cells and GC (green). Arrowheads: *Ccl21* expression close to GCs.

Image is a representative from 4 lymph nodes. **b** CCL21 protein immunohistology of drLN 8 d after foot immunization showing stronger CCL21 signal close to SCS (arrowheads) and in the T zone. Representative image from 4 ACKR4<sup>+/+</sup> lymph nodes

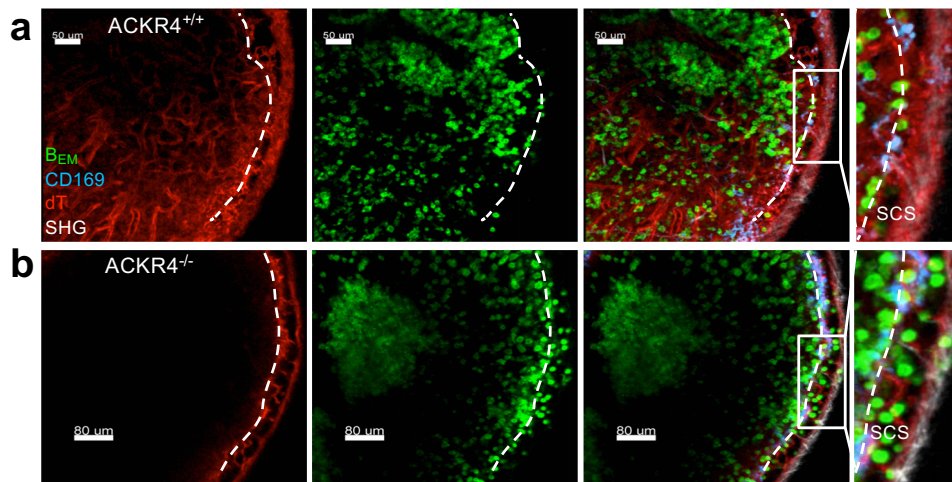

### Supplementary Figure 6: More B<sub>EM</sub> in SCS of ACKR4 deficient drLN

Still images of intravital microscopy of C<sub>y</sub>1Cre mTmG ACKR4<sup>+/+</sup> (**a**) and ACKR4<sup>-/-</sup> (**b**) in drLN 8 d after foot immunization. This shows eGFP-labelled B<sub>EM</sub> (green), mTomato-labelled stroma (red) and CD169 labelled SCS macrophages (blue). 10 μm-thick sections are shown, with stromal signal strength dependent on tissue depth. Note larger numbers of B<sub>EM</sub> in the SCS in ACKR4<sup>-/-</sup> environment. Representative images of 7 ACKR4<sup>+/+</sup> and 3 ACKR4<sup>-/-</sup> mice.



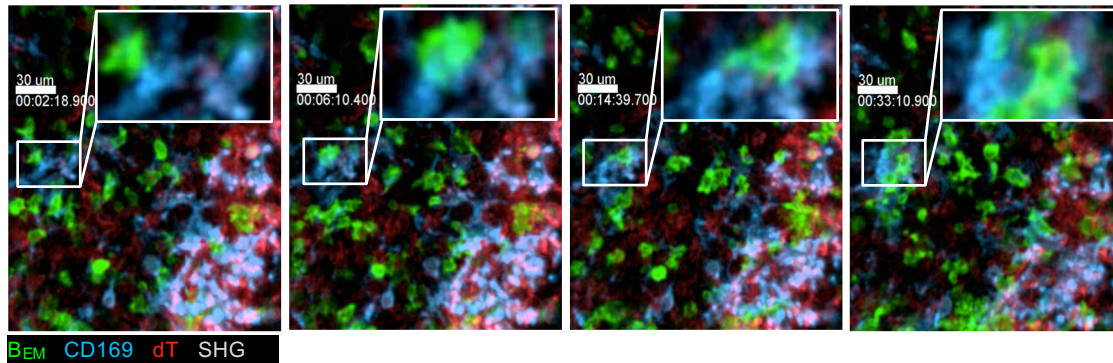

### Supplementary Figure 7: Intravital observation of B<sub>EM</sub> interacting with CD169<sup>+</sup> SCS macrophage

Still images from intravital microscopy of SCS in Cy1Cre mT/mG ACKR4<sup>+/+</sup> drLN 8 d after foot immunization. eGFP<sup>+</sup> B<sub>EM</sub> make prolonged interaction with CD169-labelled SCS macrophages (blue). mTomato positive stroma (red). Representative images of 7 in Cy1Cre mT/mG ACKR4<sup>+/+</sup> mice.

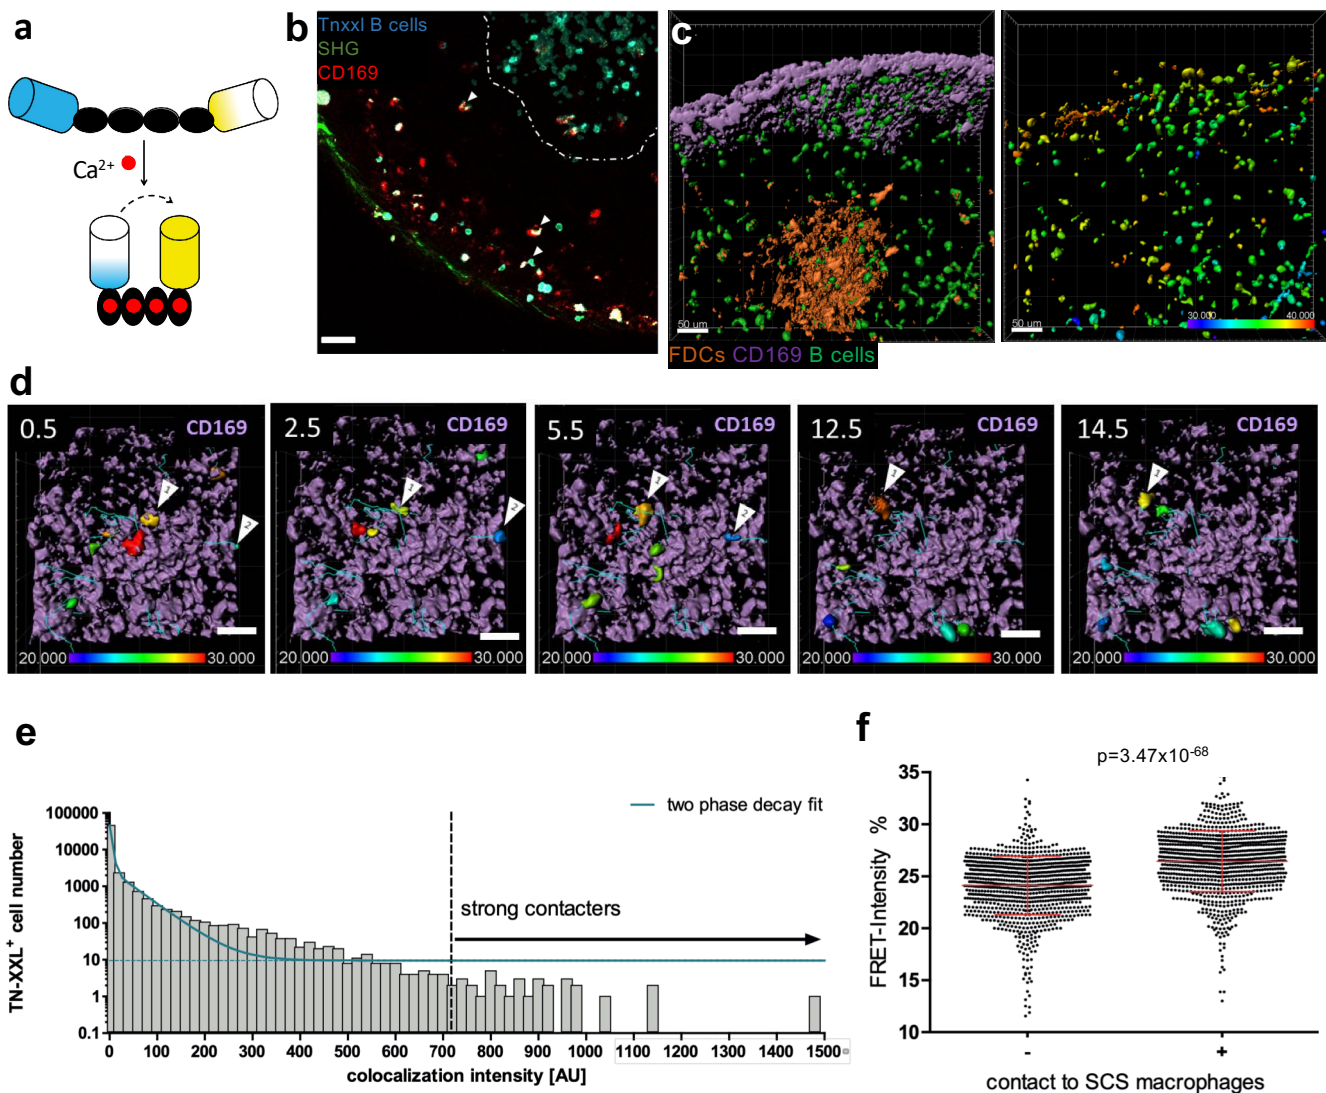

### Supplementary Figure 8: Intravital observation of intracellular $\text{Ca}^{2+}$ in $\text{B}_{\text{EM}}$

**a** Schematic representation of the genetically encoded calcium indicator TN-XXL. The four troponin c binding sites of TN-XXL (black ovals) can be loaded with four calcium ions (red) that cause a conformational change. Förster resonance energy transfer leads to decreased eCFP (blue) and increased citrine (yellow) fluorescence after multiphoton excitation with 850nm laser light. **b** Single z plane of intravitaly imaged lymph node with capsule visible (SHG), CD169-eFluor660 stained macrophages (red) and adoptively transferred TN-XXL<sup>+</sup> B1-8<sup>hi</sup> (NP-specific) B cells (cyan). A germinal center is visible at the upper right (broken white line). Contacts between CD169<sup>+</sup> macrophages and TN-XXL<sup>+</sup> B cells are shown in white (white arrows). **c** Left: Surface rendering of subcapsular sinus (light purple, CD169-stained macrophages) and germinal center (light orange, FDC staining with CD21/35-Atto590), TN-XXL<sup>+</sup> B1-8<sup>hi</sup> B cells (green). Right: FRET intensity of TN-XXL<sup>+</sup> B cells shown in left image, color-coded for mean FRET intensity. Scale bar 50  $\mu\text{m}$ . **d** Stills of TN-XXL<sup>+</sup> cells tracked over 30 minutes, mean FRET values depicted as color coding. CD169<sup>+</sup> macrophages in light purple, track lines in cyan. White arrows point to tracks analyzed in **(e)** and **(f)** for FRET and colocalization intensity over time. Scale bar 40  $\mu\text{m}$ . **e** Colocalization histogram and two-phase decay fit for analysis of colocalization between CD169<sup>+</sup> macrophages and TN-XXL<sup>+</sup> B cells. The colocalization intensity where the decay reaches a plateau was determined as threshold for strong (+) macrophage-to-B-cell contact. B cells with colocalization intensity of 0 AU were assigned to the (-) group. **f** Plot of a random selection of 1,000 mean FRET intensities (total 63,000 events) of surface rendered B cells gated on contact strengths to SCS macrophages: (-) group: colocalization intensity = 0 AU; (+) group: colocalization intensity > 717 AU. One dot per TN-XXL<sup>+</sup> object. Plot contains data from 5 animals from two different experiments. Student's two-tailed t-test with Welch correction. Data show mean and standard deviation.

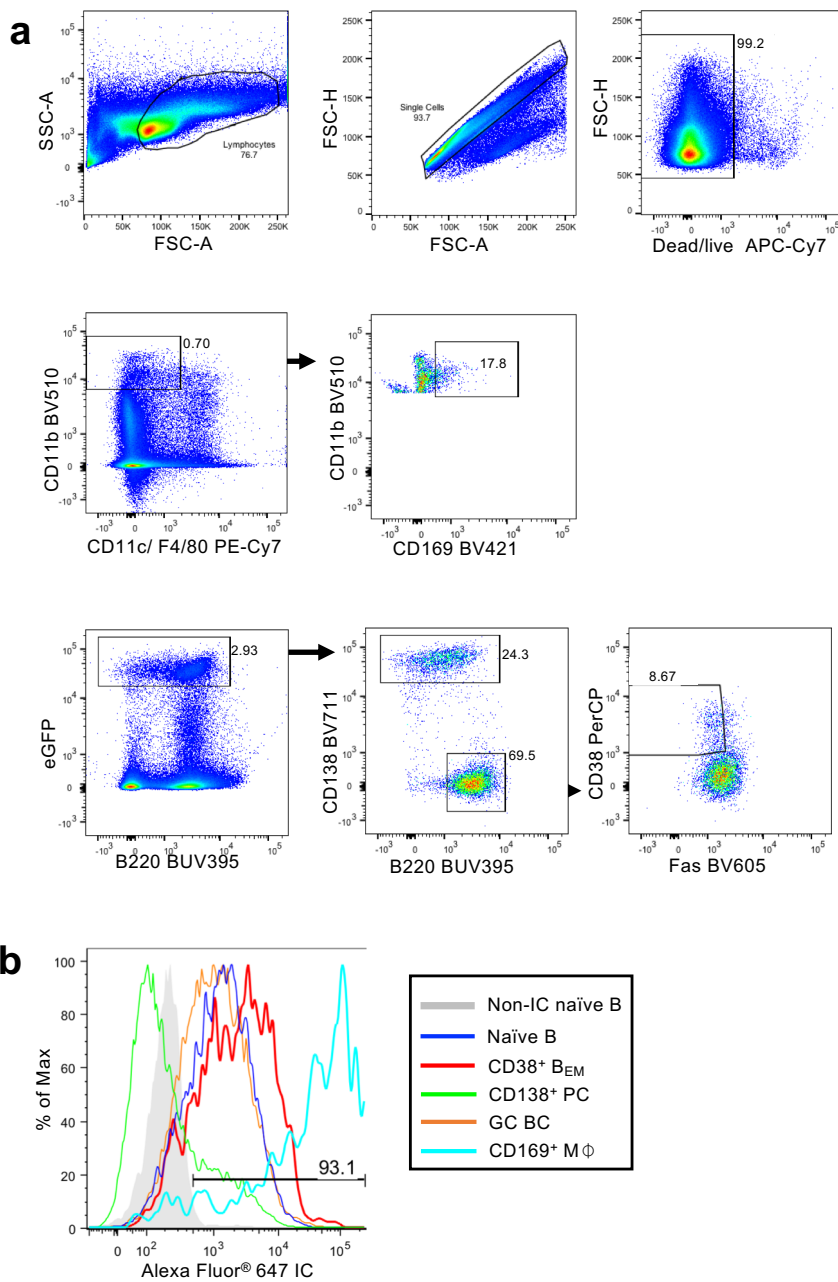

**Supplementary Figure 9: Gating scheme for F4/80-CD11b<sup>+</sup>CD169<sup>+</sup> SCS macrophages**

**a** The gating scheme for the flow cytometric detection of F4/80-CD11b<sup>+</sup>CD169<sup>+</sup> SCS macrophages<sup>4</sup>, and eGFP<sup>+</sup> B<sub>EM</sub>, GC B cell, and plasma cells from drLN is shown. Cy1Cre mTmG mice 10 min after foot injection with Alexa647 labelled immune complex (IC) at 8 d after foot immunization. **b** FACS histogram showing Alexa647 IC staining on different

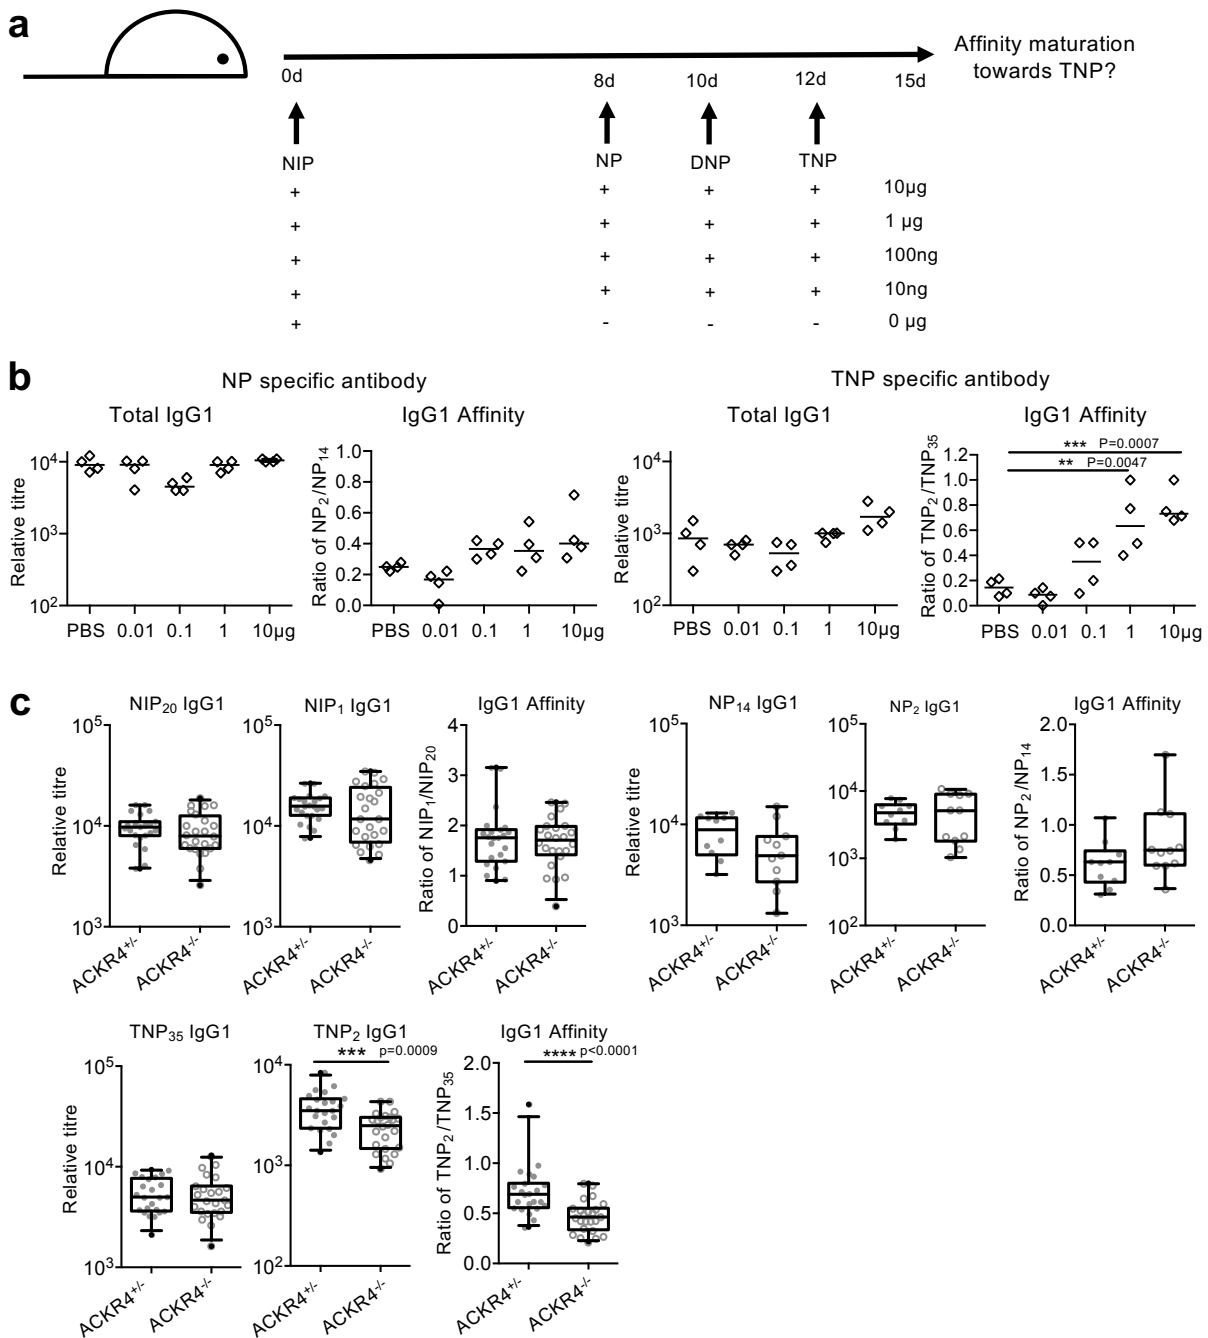

### Supplementary Figure 10: Antigenic drift experiment

**a** Experimental design to simulate antigenic drift. Wild type mice were primed with 20 µg / 20 µl NIP-KLH in alum with *B. pertussis* into foot, followed by subsequent injections 8, 10, and 12 d after immunization with soluble NP-, DNP-, TNP-KLH into the same foot respectively. Control mice received mock immunization. Blood was collected 15 days post-immunization. **b** NP- or TNP-specific antibody titer and affinity. Each dot represents one animal. ANOVA with Tukey test for multiple comparisons, \*\* p=0.0047, \*\*\* p=0.0007. **c** NIP-, NP-, or TNP-specific antibody titers and affinity after immunization of ACKR4<sup>+/+</sup> or ACKR4<sup>-/-</sup> litter mates with NIP-KLH followed by NP-, DNP-, TNP-KLH. Merged data from 4 independent experiments with 5 mice each (total n=20). Box plots show medians, boxes: 50%, whiskers: 5-95%. Symbols represent individual mice. Two-tailed Mann-Whitney test, \*\*\* p=0.0009, \*\*\*\* p<0.0001.

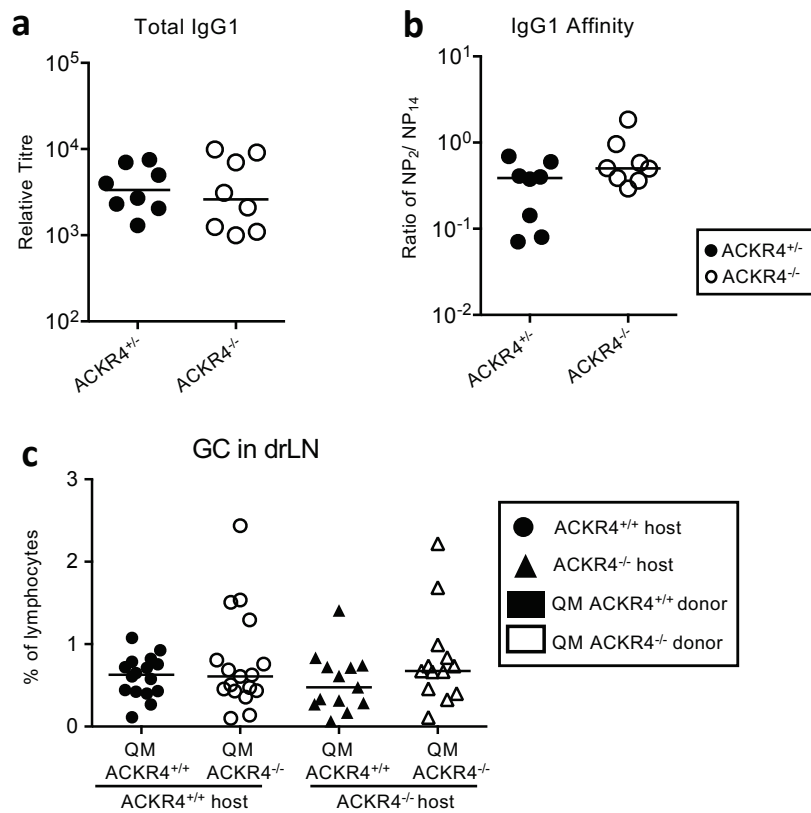

### Supplementary Figure 11: No major changes in antibody titers or antibody affinity in ACKR4<sup>-/-</sup> mice after NP-CGG immunization

**a** Relative NP-specific IgG1 antibody levels in serum of ACKR4<sup>+/-</sup> and ACKR4<sup>-/-</sup> mice 14 d post NP-CGG foot immunization. **b** Affinity of NP-specific IgG1. Plots from 2 independent experiments with 3-6 mice. Data from 14 d post primary immunization were combined from 2 independent experiments with 4 mice per group (total n=8). Each symbol represents one mouse. Horizontal line represents the median. **c** ACKR4<sup>+/+</sup> or ACKR4<sup>-/-</sup> hosts were adoptively transferred with a mix of the same numbers of NP-specific B cells from QM ACKR4<sup>+/+</sup> (mTomato<sup>+</sup>) and from QM ACKR4<sup>-/-</sup> (eYFP<sup>+</sup>) *i.v.*. Chimeras were foot immunized 24 h later with NP-CGG in alum. Sizes of GC was tested 8 days post-immunization in the drLN by flow cytometry, gating on B220<sup>+</sup> CD38<sup>low</sup> FAS<sup>+</sup> and eYFP<sup>+</sup> or mTomato<sup>+</sup> GC B cells.

The data are merged from 3 independent experiments with 4-5 mice in each experiment (total n=13-16).

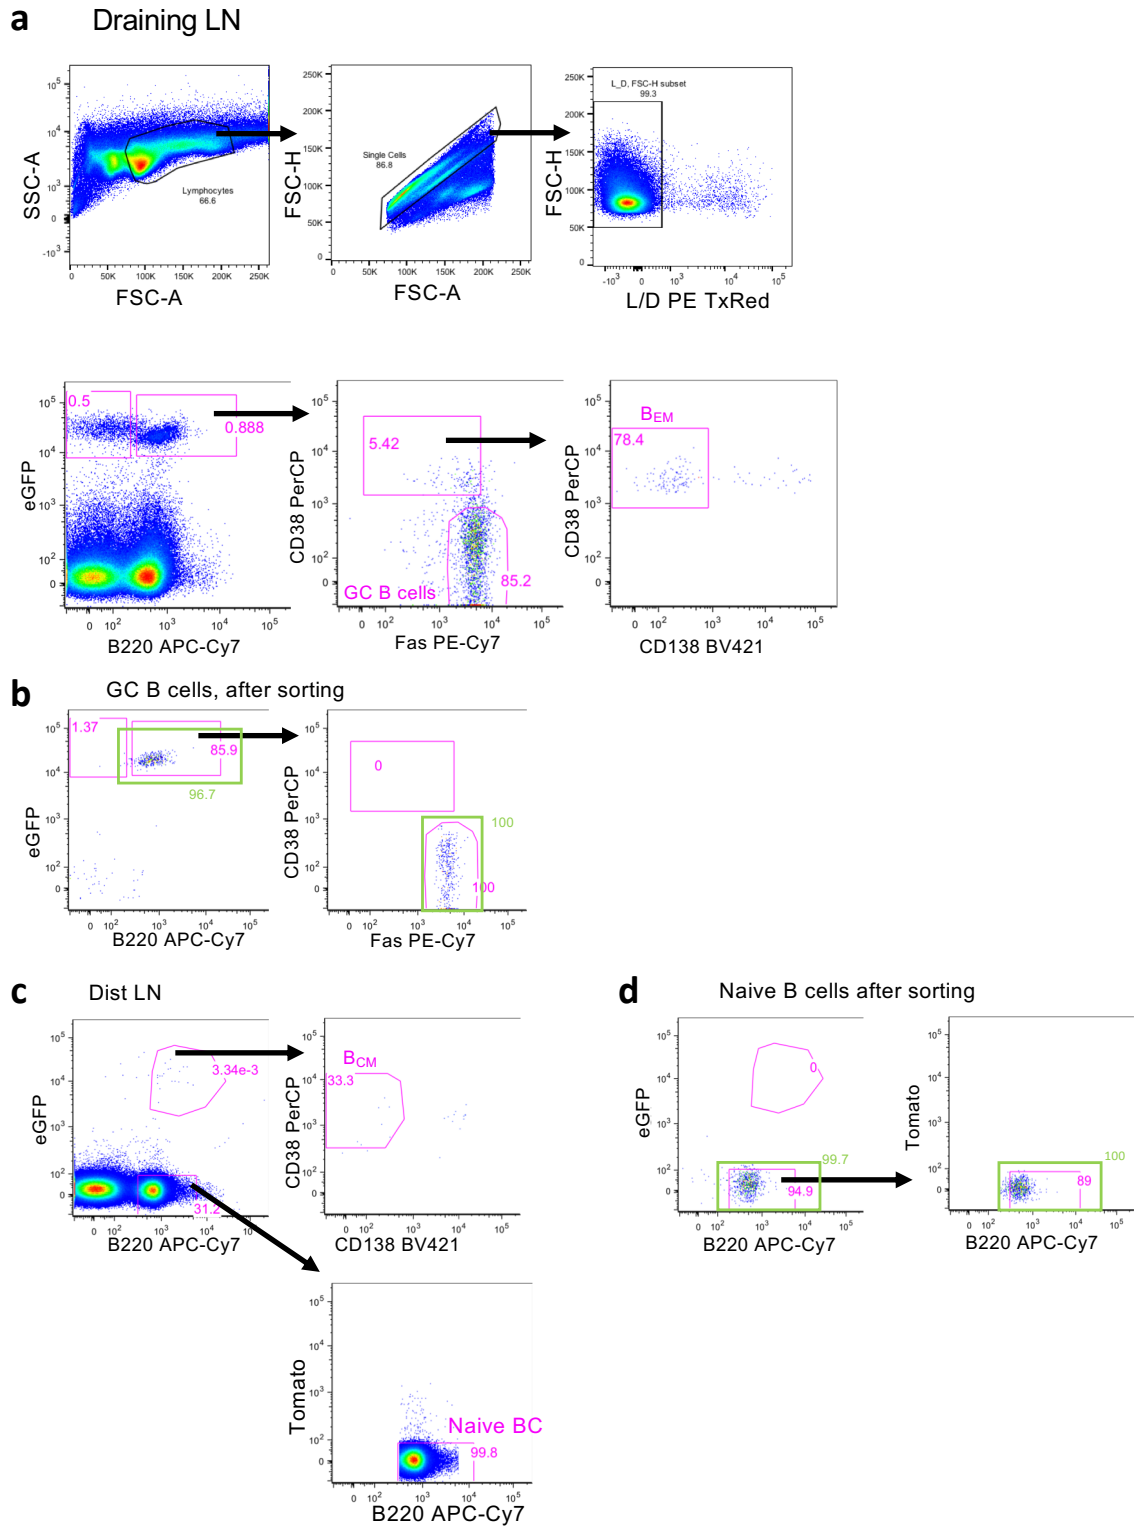

**Supplementary Figure 12: Gating scheme for qRT-PCR, RNA-seq library preparation**

FACS sorted cells from popliteal lymph node in C57BL/6J mice that had received NP<sup>+</sup> B cells from Cy1Cre QM mT/mG, 8 d after foot injection. **a** eGFP<sup>+</sup>B220<sup>+</sup>Fas<sup>+</sup>CD38<sup>-</sup> as GC B cells, and eGFP<sup>+</sup> B220<sup>+</sup>CD38<sup>+</sup>Fas<sup>int</sup>CD138<sup>-</sup> as B<sub>EM</sub> cells in drLN. **b** GC B cell reanalysis was run on an independent FACS sorter. **c** eGFP<sup>+</sup> B220<sup>+</sup>CD38<sup>+</sup>Fas<sup>-</sup>CD138<sup>-</sup> as B<sub>CM</sub>, and eGFP<sup>-</sup> Tomato<sup>-</sup> B220<sup>+</sup> as naive B cells in distLN. **d** Naive B cells after the sorting was run on an independent FACS sorter. Pink boxes and numbers: sorting gates and population size in %. Green boxes: reanalysis gates with purities in % of parent population.

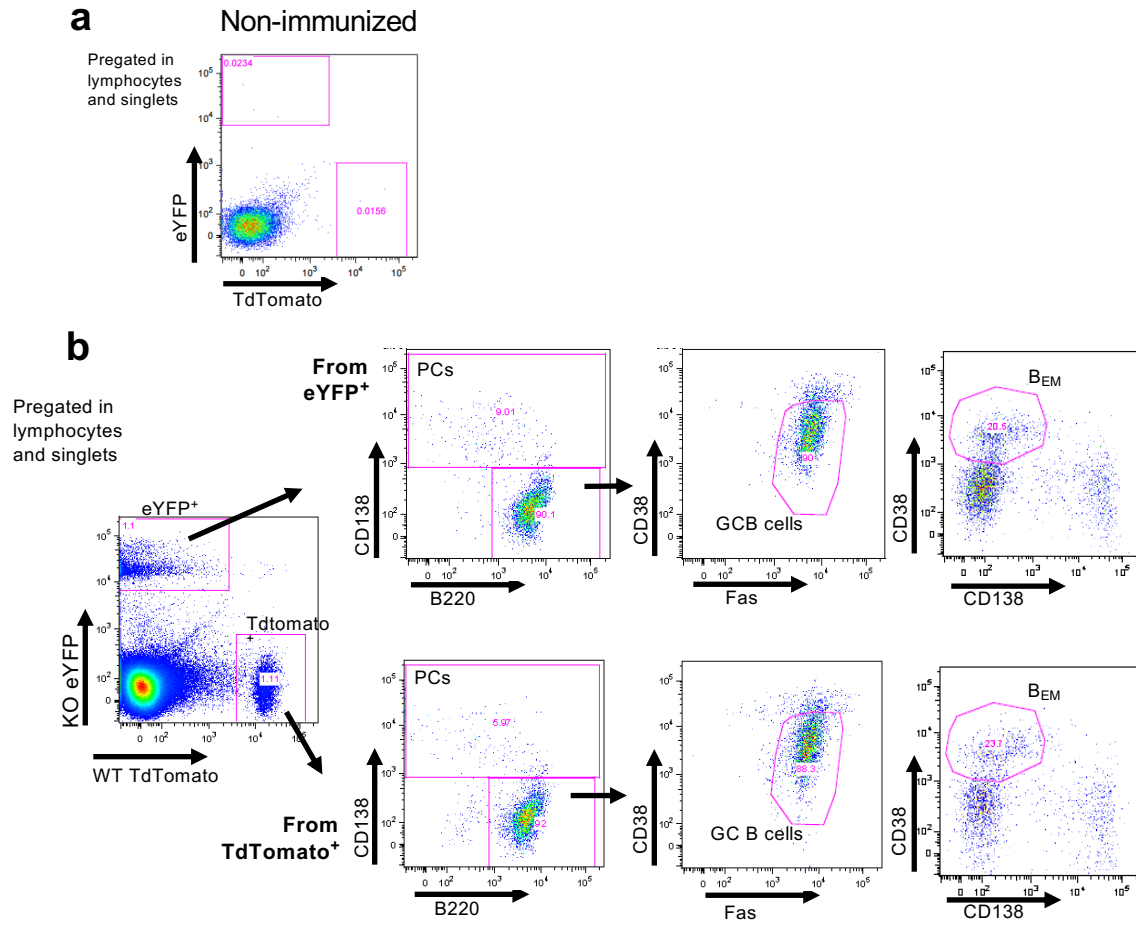

**Supplementary Figure 13: Gating scheme for GC B cells and plasma cells, B<sub>EM</sub> after co-transfer of B cells from QM ACKR4<sup>+/+</sup> and QM ACKR4<sup>-/-</sup> into ACKR4<sup>+/+</sup> or ACKR4<sup>-/-</sup> hosts.**

1x10<sup>5</sup> NP+B220<sup>+</sup> cells from QM TdTomato ACKR4<sup>+/+</sup> and 1x10<sup>5</sup> NP+B220<sup>+</sup> cells from QM eYFP ACKR4<sup>-/-</sup> were co-transferred to ACKR4<sup>+/+</sup> or ACKR4<sup>-/-</sup> hosts *i.v.* and immunized 24 h later with NP-CGG into the rear feet. The response was studied 8 days post-immunisation. **a** Representative example of a non-immunized host 8 days post-transfer with 1x10<sup>5</sup> NP+B220<sup>+</sup> cells from each genotype.

**b** Representative diagram for flow cytometry gating of plasma cells, GC B cells, DZ GC B cells and LZ GC B cells, B<sub>EM</sub> in the draining lymph node.

KO: QM eYFP ACKR4<sup>-/-</sup>; WT: QM TdTomato ACKR4<sup>+/+</sup>; PCs: plasma cells; GC: germinal center

**Supplementary Table1: Primary Antibody list**

| Specificity                           | Clone      | Source            | Reference  | RRID        | Conjugation | Dilution               |
|---------------------------------------|------------|-------------------|------------|-------------|-------------|------------------------|
| CD4                                   | RM4-5      | eBioScience       | 17-0042-82 | AB_469323   | APC         | 1/100 IHC              |
| CD138                                 | 281-2      | BD Biosciences    | 553712     | AB_394998   | purified    | 1/100 IHC              |
| CD31                                  | MEC13.3    | BioLegend         | 102504     | AB_312911   | Biotin      | 1/200 IHC              |
| IgD                                   | Polyclonal | Novus Biologicals | NBP2-69334 |             | purified    | 1/1000 IHC             |
| IgD                                   | 11-26c.2a  | BD Biosciences    | 553438     | AB_394858   | Purified    | 1/1000 IHC             |
| IgD                                   | 11-26c.2a  | BD Biosciences    | 560868     | AB_10612002 | APC         | 1/100 IHC, 1/1000 FACS |
| IgD                                   | 11-26c.2a  | BD Biosciences    | 744291     | AB_2742121  | BV421       | 1/100 IHC, 1/200 FACS  |
| Fibroblasts<br>monoclonal<br>antibody | ER-TR7     | Invitrogen        | MA1-40076  |             | purified    | 1 in 50 IHC            |
| Peanut Agglutinin<br>(PNA)            |            | Vector            | B-1075-5   |             | Biotin      | 1/200 IHC              |
| LYVE1                                 | Polyclonal | Abcam             | ab14919    |             | purified    | 1/200 IHC              |
| Ki67                                  | Polyclonal | Abcam             | ab15580    |             | purified    | 1/400 IHC              |
| CD169                                 | 3D6.112    | BioLegend         | 142402     | AB_10916523 | Purified    | 1/200 IHC              |
| CD169                                 | 3D6.112    | BioLegend         | 142408     | AB_2563621  | Al 647      | 1/200 FACS             |
| CD169                                 | 3D6.112    | BioLegend         | 142421     | AB_2734202  | BV421       | 1/200 FACS             |
| CCL21                                 | Polyclonal | R and D system    | AF457      |             | purified    | 1 in 50 IHC            |
| NP-Rabbit Ig                          |            | house made        |            |             |             | IHC                    |
| NP-PE                                 |            | house made        |            |             |             | FACS                   |
| CD16/32                               | 93         | eBioScience       | 14-0161-82 | AB_467133   | purified    | 1/200 FACS             |
| CD4                                   | RM4-5      | BioLegend         | 100559     | AB_2562608  | BV510       | 1/300 FACS             |
| B220                                  | RA3-6B2    | BD Biosciences    | 561102     | AB_10561687 | APC-Cy7     | 1/1000 FACS            |
| B220                                  | RA3-6B2    | BD Biosciences    | 553092     | AB_398531   | APC         | 1/1000 FACS            |
| B220                                  | RA3-6B2    | BD Biosciences    | 563793     | AB_2738427  | BUV395      | 1/800 FACS             |
| B220                                  | RA3-6B2    | BioLegend         | 103240     | AB_11203896 | BV421       | 1/200 FACS             |
| B220                                  | RA3-6B2    | BioLegend         | 103248     | AB_2650679  | BV510       | 1/200 FACS             |
| CD138                                 | 281-2      | BD Biosciences    | 558626     | AB_1645216  | APC         | 1/200 FACS             |
| CD138                                 | 281-2      | BD Biosciences    | 566289     | AB_2739663  | BV421       | 1/200 FACS             |
| CD138                                 | 281-2      | BioLegend         | 142519     | AB_2562571  | BV711       | 1/400. FACS            |
| CD38                                  | 90         | BD Biosciences    | 562770     | AB_2737782  | PerCP       | 1/200 FACS             |
| CD38                                  | 90         | BD Biosciences    | 562769     | AB_2728651  | Al 647      | 1/1000 FACS            |
| Fas                                   | Jo2        | BD Biosciences    | 557653     | AB_396768   | PE-Cy7      | 1/300 FACS             |
| Fas                                   | Jo2        | BD Biosciences    | 740507     | AB_2740227  | BV605       | 1/300 FACS             |
| GL7                                   | GL-7 (GL7) | eBioScience       | 48-5902-82 | AB_10870775 | eFluor 450  | 1/100 FACS             |
| Bcl6                                  | K112-91    | BD Biosciences    | 563582     | AB_2738292  | PE-Cy7      | 1/300 FACS             |
| CD62L                                 | MEL-14     | BioLegend         | 104441     | AB_2561537  | BV510       | 1/200 FACS             |
| CD73                                  | TY/11.8    | eBioScience       | 25-0731-82 | AB_10853348 | PE-Cy7      | 1/200 FACS             |
| CD80                                  | 16-10A1    | eBioScience       | 15-0801-82 | AB_468774   | PE-Cy5      | 1/200 FACS             |
| PD-L2 (CD273)                         | TY25       | BioLegend         | 107203     | AB_345251   | Biotin      | 1/100 FACS             |
| CCR7                                  | 4B12       | BD Biosciences    | 560682     | AB_1727442  | PE          | 1/100 FACS             |
| CD11b                                 | M1/70      | BioLegend         | 101263     | AB_2629529  | BV510       | 1/200 FACS             |
| CD11c                                 | N418       | eBioScience       | 25-0114-82 | AB_469590   | PE-Cy7      | 1/400 FACS             |
| CD11c                                 | N418       | eBioScience       | 17-0114-82 | AB_469346   | APC         | 1/500 FACS             |
| F4/80                                 | BM8        | eBioScience       | 25-4801-82 | AB_469653   | PE-Cy7      | 1/400 FACS             |



**Supplementary Table2: Secondary reagents**

| <b>Target</b>          | <b>Host</b> |            | <b>Source</b>          | <b>Cat</b>  | <b>Conjugated</b> | <b>Dilution</b> |
|------------------------|-------------|------------|------------------------|-------------|-------------------|-----------------|
| Rat                    | Donkey      | polyclonal | Jackson Immunoresearch | 712-545-153 | Alexa Fluor 488   | 1/300 IHC       |
| Rat                    | Donkey      | polyclonal | Jackson Immunoresearch | 712-165-153 | Cy3               | 1/500 IHC       |
| Rat                    | Donkey      | polyclonal | Jackson Immunoresearch | 712-136-153 | APC               | 1/500 IHC       |
| Rabbit                 | Donkey      | polyclonal | Jackson Immunoresearch | 711-095-152 | FITC              | 1/300 IHC       |
| Rabbit                 | Donkey      | polyclonal | Jackson Immunoresearch | 711-165-152 | Cy3               | 1/500 IHC       |
| Rabbit                 | Donkey      | polyclonal | Jackson Immunoresearch | 711-605-152 | Alexa Fluor 647   | 1/500 IHC       |
| Sheep                  | Donkey      | polyclonal | Jackson Immunoresearch | 713-545-147 | Alexa Fluor 488   | 1/300 IHC       |
| Goat                   | Donkey      | polyclonal | Invitrogen             | A21432      | Alexa Fluor 555   | 1/500 IHC       |
| Goat                   | Donkey      | polyclonal | Jackson Immunoresearch | 705-605-147 | Alexa Fluor 647   | 1/500 IHC       |
| RFP                    | Rabbit      | polyclonal | Abcam                  | ab34771     | Biotin            | 1/300 IHC       |
| GFP                    | Rabbit      | polyclonal | Invitrogen             | A-21311     | Alexa Fluor488    | 1/1000 IHC      |
| Streptavidin alexa 555 |             |            | Invitrogen             | S32355      |                   | 1/500 IHC       |
| Streptavidin alexa 488 |             |            | Jackson Immunoresearch | 016-540-086 |                   | 1/500 IHC       |
| Streptavidin alexa 647 |             |            | Jackson Immunoresearch | 016-600-084 |                   | 1/500 IHC       |
| Streptavidin BV421     |             |            | BioLegend              | 405225      |                   | 1/400 FACS      |
| Streptavidin BV711     |             |            | BioLegend              | 405241      |                   | 1/400 FACS      |

**Supplementary Table3: Sequence of primers and probes used for qRT-PCR**

| Primer     | Forward primer sequence (5'-3') | Reverse primer sequence (5'-3') | Probe sequence (5'-3')        |
|------------|---------------------------------|---------------------------------|-------------------------------|
| Blimp-1    | CAAGAATGCCAACAGGAAGTATTTT       | CCATCAATGAAGTGGTGGAACTC         | TCTCTGGAATAGATCCGCCA          |
| IRF4       | GGAGGACGCTGCCCTCTT              | TCTGGCTTGTGATCCCTTCT            | AGGCTTGGGCATTGTTTAAAGGCAAGTTC |
| Aicda      | GTCCGGCTAACCAGACAACCTTC         | GCTTTCAAATCCCAACATACGA          | GCTTTCAAATCCCAACATACGA        |
| Bcl6       | CAGACGCACAGTGACAAACCA           | ACTGCGCTCCACAAATGTTACA          | ACTGCGCTCCACAAATGTTACA        |
| S1PR1      | AAATGCCCAACGGAGACT              | CTGATTTGCTGCGGCTAAATTC          |                               |
| S1PR2      | GGCCTAGCCAGTGCTCAGC             | CCTTGGTGTAAATTGTAGT             | CAGAGTACCTCAATCCTGA           |
| CCR7       | GGTGGCTCTCCTTGTCATTTTC          | GTGGTATTCTCGCCGATGTAGTC         | TGCTTCTGCCAAGATGAGGTCACCG     |
| CXCR5      | GCTCTGCACAAGATCAATTTCTACTG      | CCGTGCAGGTGATGTGGAT             | CCATCGTCCATGCTGTTACGCC        |
| CXCR4      | TGCTCCGGTAACCACCAC              | CCAGAACCCACTTCTTCAGAGTAG        | TAGAGCGAGTGTTGCCATGGAACC      |
| ACKR4      | TGGATCCAAGATAAAGGCGGGGTGT143YES | TGACTGGTTCAGCTCCAGAGCCATG       |                               |
| $\beta$ 2m | CTGCAGAGTTAAGCATGCCAGTAT        | ATCACATGTCTCGATCCCAGTAGA        | CGAGCCCAAGACC                 |

All primers and probes are from Eurofins Genomics (Ebersberg Germany). S1pr1 and Ackr4 were run with SYBRGreen real time PCR (Thermo Fisher Scientific). Cxcr3 (Mm00438259\_m1), Ccr6 (Mm01700300\_g1), Ebi2 (Mm02620906\_s1) were TaqMan gene expression assays (Thermo Fisher Scientific, UK)

## References:

1. Muzumdar MD, Tasic B, Miyamichi K, Li L, Luo L. A global double-fluorescent Cre reporter mouse. *Genesis* 45, 593-605 (2007).
2. Liberzon A, Birger C, Thorvaldsdottir H, Ghandi M, Mesirov JP, Tamayo P. The Molecular Signatures Database (MSigDB) hallmark gene set collection. *Cell Syst* 1, 417-425 (2015).
3. Laidlaw BJ, Schmidt TH, Green JA, Allen CD, Okada T, Cyster JG. The Eph-related tyrosine kinase ligand Ephrin-B1 marks germinal center and memory precursor B cells. *J Exp Med* 214, 639-649 (2017).
4. Gray EE, Friend S, Suzuki K, Phan TG, Cyster JG. Subcapsular sinus macrophage fragmentation and CD169<sup>+</sup> bleb acquisition by closely associated IL-17-committed innate-like lymphocytes. *PLoS One* 7, e38258 (2012).
