# Supplementary material for: Recycling of memory B cells between germinal center and lymph node subcapsular sinus supports affinity maturation to antigenic drift
Source: Nat Commun. 2022 May 5;13:2460. doi: 10.1038/s41467-022-29978-y (PMC9072412; doi:10.1038/s41467-022-29978-y)
Supplement: Supplementary file 3 — Description of additional Supplementary File [file 41467_2022_29978_MOESM3_ESM.pdf]

## **Descriptions of additional supplementary Data files**

### **Supplementary movie 1: Movement of B<sub>EM</sub> between GC and SCS and inside the SCS.**

Intravital microscopy. Overview of a Cy1Cre mTmG ACKR4<sup>+/+</sup> drLN day 8 after foot immunization.

Cy1Cre-dependent expression of eGFP (green) shows GC and B<sub>EM</sub>. CD169 (blue) indicates location of SCS with SCS macrophages. Red: mTomato expressing stroma. Grey: second harmonic.

### **Supplementary movie 2: Tracking GFP<sup>+</sup> B<sub>EM</sub> recycling between GC and SCS**

Intravital microscopy of three drLN data of Cy1Cre mTmG ACKR4<sup>+/+</sup> mice. eGFP-labelled B<sub>EM</sub> (green), mTomato-labelled stroma (red) and CD169 labelled SCS macrophages (blue). B<sub>EM</sub> were manually tracked moving from the GC towards the SCS (pink tracks) or recycling from the SCS to the GC (blue tracks).

### **Supplementary movie 3: Location of B<sub>EM</sub> in relation to SCS macrophages and SCS lumen in wt and ACKR4<sup>ko</sup> drLN.**

Intravital microscopy. 3D still image of SCS of a Cy1Cre mTmG Ackr4<sup>+/+</sup> and Ackr4<sup>-/-</sup> drLN 8 d after foot immunization. Cy1Cre-dependent expression of eGFP (green) indicating B<sub>EM</sub>. CD169 (blue) SCS macrophages lining the SCS floor endothelium. Red: mTomato expressing stroma. Grey: second harmonic indicating the LN capsule. B<sub>EM</sub> can be seen inside the LN parenchyma and having entered the SCS.

### **Supplementary movie 4: B<sub>EM</sub> moving along the SCS in ACKR4<sup>-/-</sup> drLN**

Intravital microscopy of SCS of a Cy1Cre mTmG ACKR4<sup>-/-</sup> drLN 8 d after foot immunization. Cy1Cre-dependent expression of eGFP positive B cells (green and white). CD169 (blue) SCS macrophages lining the SCS floor endothelium. Red: mTomato expressing stroma. Tracked cells (white) can be seen moving inside the SCS, but not reentering the LN parenchyma.

### **Supplementary movie 5: Prolonged interaction of B<sub>EM</sub> with SCS macrophage**

Intravital microscopy of a Cy1Cre mTmG drLN 8 d after foot immunization. Cy1Cre-dependent expression of eGFP (green) indicating B<sub>EM</sub>. Red: mTomato expressing stroma. Blue: CD169 on SCS macrophages.

### **Supplementary movie 6: Colocalization of B<sub>EM</sub> with increased Ca<sup>2+</sup> and SCS macrophages**

Animation merging images from Fig. 4B, showing surface rendering of CD169<sup>+ve</sup> macrophages (purple), FDC staining outlining a GC (orange), and eGFP<sup>+</sup> B cells (green) in one frame, and the FRET intensity of B cells in the second frame. The B cell FRET intensity is color coded from purple (low) to orange (high).

Orange B cells with  $\text{Ca}^{2+}$  FRET signal are seen in close contact with  $\text{CD169}^{+ve}$  macrophages in the SCS at top edge of the lymph node section, and inside the GC.

#### **Supplementary movie 7: $\text{B}_{EM}$ acquiring $\text{CD169}^{+}$ material from SCS macrophage**

Intravital microscopy of a  $\text{Cy1Cre mTmG drLN}$  8 d after foot immunization.  $\text{Cy1Cre}$ -dependent expression of eGFP (green) indicating  $\text{B}_{EM}$ .  $\text{CD169}^{+}$  material (blue) can be seen at the trailing edge of the migrating  $\text{B}_{EM}$ .

#### **Supplementary movie 8: 360-rotation showing $\text{B}_{EM}$ trafficking between the GC and the SCS**

Light sheet microscopy shows  $\text{tdTomato}^{+} \text{B}_{EM}$  from a  $\text{S1PR1}^{\text{CreERT2}} \text{Ai14}$  mouse of a, 8 d after NP-CGG foot immunization.  $\text{dTomato}^{+} \text{BEM}$  in red,  $\text{CD169}^{+}$  macrophages indicating the SCS floor in blue.

#### **Supplementary movie 9: 360-rotation showing $\text{B}_{EM}$ interacting with IC in SCS**

Light sheet microscopy of  $\text{tdTomato}^{+} \text{B}_{EM}$  (red) in a  $\text{drLN}$  of a  $\text{S1PR1}^{\text{CreERT2}} \text{Ai14}$  mouse, 10 min after injection with Alexa488 labelled immune complex (IC) into the foot. IC is shown in green.  $\text{B}_{EM}$  are seen in the GC, between the GC and interacting with IC in the SCS floor.

#### **Supplementary movie 10: $\text{B}_{EM}$ moving between GC and SCS**

Light sheet microscopy shows  $\text{tdTomato}^{+} \text{B}_{EM}$  (red) in a  $\text{drLN}$  of a  $\text{S1PR1}^{\text{CreERT2}} \text{Ai14}$  mouse, 10 min after injection with Alexa488 labelled immune complex (IC) into the foot. IC is shown in green.  $\text{B}_{EM}$  are seen travelling between the GC (left) and IC in the SCS (bottom left), and in close contact with IC in the SCS floor.
